# Supplementary material for: Diversity, Ecological Characteristics and Identification of Some Problematic Phytopathogenic Fusarium in Soil: A Review
Source: MDPI journal article supplement (doi:10.3390/d15010049), 2023-01-01
Supplement: s1 [file s1]

Archive with 1 entries (1 files):
- diversity-2056657-supplementary.pdf
