# Supplementary material for: Diversity, Ecological Characteristics and Identification of Some Problematic Phytopathogenic Fusarium in Soil: A Review
Source: MDPI journal article supplement (doi:10.3390/d15010049), 2023-01-01
Supplement: s1 [file s1 › diversity-2056657-supplementary.pdf]

Table S1: Morphology features of Fusarium species.

| Table by Kee, Y. J., Zakaria, L., & Mohd, M. H. (2020). Morphology, phylogeny and pathogenicity of Fusarium species from Sansevieria trifasciata in Malaysia. <i>Plant Pathology</i> , 69(3), 442-454. |                                                                                                                                                                 |                                                             |                                               |              |
|--------------------------------------------------------------------------------------------------------------------------------------------------------------------------------------------------------|-----------------------------------------------------------------------------------------------------------------------------------------------------------------|-------------------------------------------------------------|-----------------------------------------------|--------------|
| Fungal propagule                                                                                                                                                                                       | Shape                                                                                                                                                           | Colour                                                      | Size                                          | Septation    |
| <i>Fusarium solani</i>                                                                                                                                                                                 |                                                                                                                                                                 |                                                             |                                               |              |
| Colony                                                                                                                                                                                                 | Floccose, Scant aerial mycelium                                                                                                                                 | Initially white, turning light orange coloured at agar base | 90 mm dia. In 10 days                         | -            |
| Hyphae                                                                                                                                                                                                 | Smooth, cylendrical and branched                                                                                                                                | Hyaline                                                     | 3.50–5.20 µm in width                         | Septate      |
| Conidiophores                                                                                                                                                                                          | Cylendrical, short and simple                                                                                                                                   | Hyaline                                                     | 88.60–110.50×2.50- 4.50 µm                    | Septate      |
| Microconidia                                                                                                                                                                                           | Round to oval                                                                                                                                                   | Hyaline                                                     | 7.50–11.00×2.80–3.75 µm Av. (9.75×3.20 µm)    | 0-1Septate   |
| Macroconidia                                                                                                                                                                                           | Curved with short , pedicellate basal cells                                                                                                                     | Hyaline                                                     | 21.15–32.00×3.80–4.75 µm Av. (28.50×4.30 µm)  | 3-4 Septate  |
| Clamydospores                                                                                                                                                                                          | Spherical, smooth and rough walled, Produced terminally, intercalary, single or in chains                                                                       | Hyaline                                                     | 5.80–9.00 µm in dia                           | Aseptate     |
| <i>Fusarium oxysporum</i>                                                                                                                                                                              |                                                                                                                                                                 |                                                             |                                               |              |
| Colony                                                                                                                                                                                                 | Floccose, abundant aerial mycelium                                                                                                                              | Initially white, turning felted, peach brown at agar base   | 90 mm dia. In 10 days                         | -            |
| Hyphae                                                                                                                                                                                                 | Smooth, cylindrical and branched                                                                                                                                | Hyaline                                                     | 3.00—4.80                                     | Septate      |
| Conidiophores                                                                                                                                                                                          | Cylindrical, short and simple                                                                                                                                   | Hyaline                                                     | 87.40–112.50×2.50- 5.00 µm                    | Septate      |
| Microconidia                                                                                                                                                                                           | Ellipsoidal to cylindrical, straight or curved borne on short simple philaids                                                                                   | Hyaline                                                     | 6.80–16.00×3.50–4.00 µm                       | 0-1Septate   |
| Macroconidia                                                                                                                                                                                           | Fusiform, pointed at both ends, basal cells pediculate                                                                                                          | Hyaline                                                     | 32.50–44.00×4.00–5.50 µm                      | 2- 4 Septate |
| Clamydospores                                                                                                                                                                                          | Spherical, smooth and rough walled, Produced terminally, latterly or intercalary                                                                                | Hyaline                                                     | 5.00–11.00 µm                                 | -            |
| <i>Fusarium equiseti</i>                                                                                                                                                                               |                                                                                                                                                                 |                                                             |                                               |              |
| Colony                                                                                                                                                                                                 | Floccose, abundant aerial mycelium                                                                                                                              | Initially white, turning peach orange at agar base          | 90 mm dia. In 10 days                         | -            |
| Hyphae                                                                                                                                                                                                 | Smooth, cylindrical and branched                                                                                                                                | Hyaline                                                     | 3.25—4.80 µm in width                         | Septate      |
| Conidiophores                                                                                                                                                                                          | Cylindrical, short and simple                                                                                                                                   | Hyaline                                                     | 72.50–106.30×3.00- 4.50 µm                    | Septate      |
| Microconidia                                                                                                                                                                                           | Oval                                                                                                                                                            | Hyaline                                                     | 12–16×3.20– 4.50 16.00 µm Av. (13.00×3.85 µm) | 0-1Septate   |
| Macroconidia                                                                                                                                                                                           | Curved with tapered and elongated apical cell; prominent foot cell                                                                                              | Hyaline                                                     | 24.00–40.00×4.00–6.00 µm Av. (3.00×5.30 µm)   | 2- 5 Septate |
| Clamydospores                                                                                                                                                                                          | Spherical, smooth and rough walled, Produced terminally, latterly or intercalary or in pairs, frequently forming chains                                         | Hyaline                                                     | 5.00–11.00 µm                                 | -            |
| <i>Fusarium brachygibbosum</i>                                                                                                                                                                         |                                                                                                                                                                 |                                                             |                                               |              |
| Colony                                                                                                                                                                                                 | Colony appearance was cottony or velvety with abundant aerial mycelia, initially white then gradually turned to orange-yellow on both upper and lower surfaces. | Cream or pale orange sporodochia were formed on PDA and CLA | 14.2 ± 1.0 mm/day                             | -            |

|                              |                                                                                                                                                                                                                                                                                                                                 |                                                                                               |                               |             |
|------------------------------|---------------------------------------------------------------------------------------------------------------------------------------------------------------------------------------------------------------------------------------------------------------------------------------------------------------------------------|-----------------------------------------------------------------------------------------------|-------------------------------|-------------|
| Hyphae                       | Smooth, cylindrical and branched                                                                                                                                                                                                                                                                                                | Hyaline                                                                                       | -                             | Septate     |
| Conidiophores                | Cylindrical, short and simple                                                                                                                                                                                                                                                                                                   | Hyaline                                                                                       | -                             | Septate     |
| Microconidia                 | Microconidia ovoid to ellipsoid, 0- to 2-septate, hyaline, and $5.9\text{--}13.6 \times 2.3\text{--}3.9 \mu\text{m}$                                                                                                                                                                                                            | Hyaline                                                                                       | -                             | 0-1 Septate |
| Macroconidia                 | Macroconidia abundant, slightly falcate to almost straight, widened at central cells with tapering apices and foot-shaped bases, usually 3- to 5-septate, hyaline, and $20.7\text{--}31.3 \times 4.0\text{--}6.0 \mu\text{m}$                                                                                                   | Hyaline                                                                                       | -                             | 3-4 Septate |
| Clamydospores                | Clamydospores abundant, spherical to oval, terminal or intercalary in the hyphae, singly or in chains, hyaline to pale yellow, and $7.7\text{--}16.0 \times 8.4\text{--}16.0 \mu\text{m}$                                                                                                                                       | Hyaline                                                                                       | -                             | Aseptate    |
| <i>Fusarium concentricum</i> |                                                                                                                                                                                                                                                                                                                                 |                                                                                               |                               |             |
| Colony                       | Colony floccose with abundant aerial mycelia, white to greyish-purple in concentric rings on both upper and lower surfaces.                                                                                                                                                                                                     | Pale purple pigments in the agar were observed. Orange sporodochia were formed on PDA and CLA | $10.7 \pm 0.5 \text{ mm/day}$ | -           |
| Hyphae                       | Average mycelial growth rate was.                                                                                                                                                                                                                                                                                               | Hyaline                                                                                       | -                             | Septate     |
| Conidiophores                | Cylindrical, short and simple                                                                                                                                                                                                                                                                                                   | Hyaline                                                                                       | -                             | Septate     |
| Microconidia                 | Oval, obovoid, sometimes with wedge-shaped or pointed ends, 0- to 1-septate, hyaline, and $5.8\text{--}18.2 \times 1.7\text{--}3.5 \mu\text{m}$ . Microconidia appeared as false heads were borne on short monophialides or polyphialides. Sporadically, microconidia arranged side by side in short false chains were observed | Hyaline                                                                                       | -                             | 0-1 Septate |
| Macroconidia                 | Macroconidia slender, mostly straight without significant curvature, 3- to 5-septate, hyaline, $27.1\text{--}59.2 \times 2.1\text{--}3.5 \mu\text{m}$ with beaked apices and foot-shaped bases                                                                                                                                  | Hyaline                                                                                       | -                             | 3-4 Septate |
| Clamydospores                | absent                                                                                                                                                                                                                                                                                                                          | -                                                                                             | -                             | -           |
| <i>Fusarium mangiferae</i>   |                                                                                                                                                                                                                                                                                                                                 |                                                                                               |                               |             |
| Colony                       | Colony appearance was cottony with sparse to abundant aerial mycelia, white to pinkish-purple alternating in concentric rings on both upper and lower surfaces.                                                                                                                                                                 | Orange sporodochia were produced on CLA                                                       | $12.0 \pm 1.0 \text{ mm/day}$ | -           |
| Hyphae                       | Average mycelial growth rate was.                                                                                                                                                                                                                                                                                               | Hyaline                                                                                       | -                             | Septate     |
| Conidiophores                | Cylindrical, short and simple                                                                                                                                                                                                                                                                                                   | Hyaline                                                                                       | -                             | Septate     |
| Microconidia                 | obovoid or oval to allantoid, 0- to 1-septate, hyaline, and $4.3\text{--}21.9 \times 1.2\text{--}2.7 \mu\text{m}$ (mean $\pm$ SD = $10.0 \pm 3.0 \times 1.7 \pm 0.2 \mu\text{m}$ ; Microconidia usually appeared as small false heads borne on short monophialides or polyphialides                                             | Hyaline                                                                                       | -                             | 0-1 Septate |
| Macroconidia                 | produced on CLA were slender, falcate, some slightly curved, mostly straight with tapering to slightly curved apices, and                                                                                                                                                                                                       | Hyaline                                                                                       | -                             | 3-4 Septate |

|                                  |                                                                                                                                                                                                                                                                                                                                                                       |                                                                                                 |                               |             |
|----------------------------------|-----------------------------------------------------------------------------------------------------------------------------------------------------------------------------------------------------------------------------------------------------------------------------------------------------------------------------------------------------------------------|-------------------------------------------------------------------------------------------------|-------------------------------|-------------|
|                                  | foot-shaped bases, 3- to 5-septate, hyaline, and $22.9\text{--}63.3 \times 1.6\text{--}3.5 \mu\text{m}$                                                                                                                                                                                                                                                               |                                                                                                 |                               |             |
| Clamydospores                    | absent                                                                                                                                                                                                                                                                                                                                                                | -                                                                                               | -                             | -           |
| <i>Fusarium proliferatum</i>     |                                                                                                                                                                                                                                                                                                                                                                       |                                                                                                 |                               |             |
| Colony                           | Colony appearance was cottony or floccose with sparse to abundant aerial mycelia, initially white but sometimes turning greyish-white to pale purple with age or in alternating pale and dark purple concentric rings on both upper and lower surfaces.                                                                                                               | Orange sporodochia on CLA were observed.                                                        | $12.2 \pm 3.5 \text{ mm/day}$ | -           |
| Hyphae                           | Average mycelial growth rate was.                                                                                                                                                                                                                                                                                                                                     | Hyaline                                                                                         | -                             | Septate     |
| Conidiophores                    | Cylindrical, short and simple                                                                                                                                                                                                                                                                                                                                         | Hyaline                                                                                         | -                             | Septate     |
| Microconidia                     | Microconidia clavate with truncate bases, obovoid, 0- to 1-septate, hyaline, and $4.2\text{--}20.4 \times 1.4\text{--}2.6 \mu\text{m}$ (mean $\pm$ SD = $8.1 \pm 3.2 \times 1.8 \pm 0.2 \mu\text{m}$ ; Figure 2d). Microconidia were borne in chains of varying length, usually moderate to long, or appeared as false heads borne on monophialides and polyphialides | Hyaline                                                                                         | -                             | 0-1 Septate |
| Macroconidia                     | Macroconidia slender, fusiform, straight to sickle-shaped with curved apices and foot-shaped bases, 3- to 5-septate, hyaline, and $20.9\text{--}59.4 \times 1.6\text{--}3.2 \mu\text{m}$                                                                                                                                                                              | Hyaline                                                                                         | -                             | 3-4 Septate |
| Clamydospores                    | absent                                                                                                                                                                                                                                                                                                                                                                | -                                                                                               | -                             | -           |
| <i>Fusarium pseudocircinatum</i> |                                                                                                                                                                                                                                                                                                                                                                       |                                                                                                 |                               |             |
| Colony                           | Colony appearance was lanose, feathery with abundant aerial mycelia, white to pinkish-violet on upper surface, as a whole or in concentric rings on the lower surface.                                                                                                                                                                                                | Violet pigment in the agar sometimes produced with age. Orange sporodochia on CLA were observed | $11.7 \pm 0.7 \text{ mm/day}$ | -           |
| Hyphae                           | Average mycelial growth rate was.                                                                                                                                                                                                                                                                                                                                     | Hyaline                                                                                         | -                             | Septate     |
| Conidiophores                    | Cylindrical, short and simple                                                                                                                                                                                                                                                                                                                                         | Hyaline                                                                                         | -                             | Septate     |
| Microconidia                     | Microconidia were oval to obovoid or reniform, 0- to 1-septate, hyaline, and $3.5\text{--}21.7 \times 1.2\text{--}3.5 \mu\text{m}$                                                                                                                                                                                                                                    | Hyaline                                                                                         | -                             | 0-1 Septate |
| Macroconidia                     | Macroconidia were straight to falcate, with slightly beaked apices and foot-shaped bases, 3- to 5-septate, hyaline, and $25.6\text{--}46.9 \times 2.3\text{--}3.4 \mu\text{m}$                                                                                                                                                                                        | Hyaline                                                                                         | -                             | 3-4 Septate |
| Clamydospores                    | absent                                                                                                                                                                                                                                                                                                                                                                | -                                                                                               | -                             | -           |

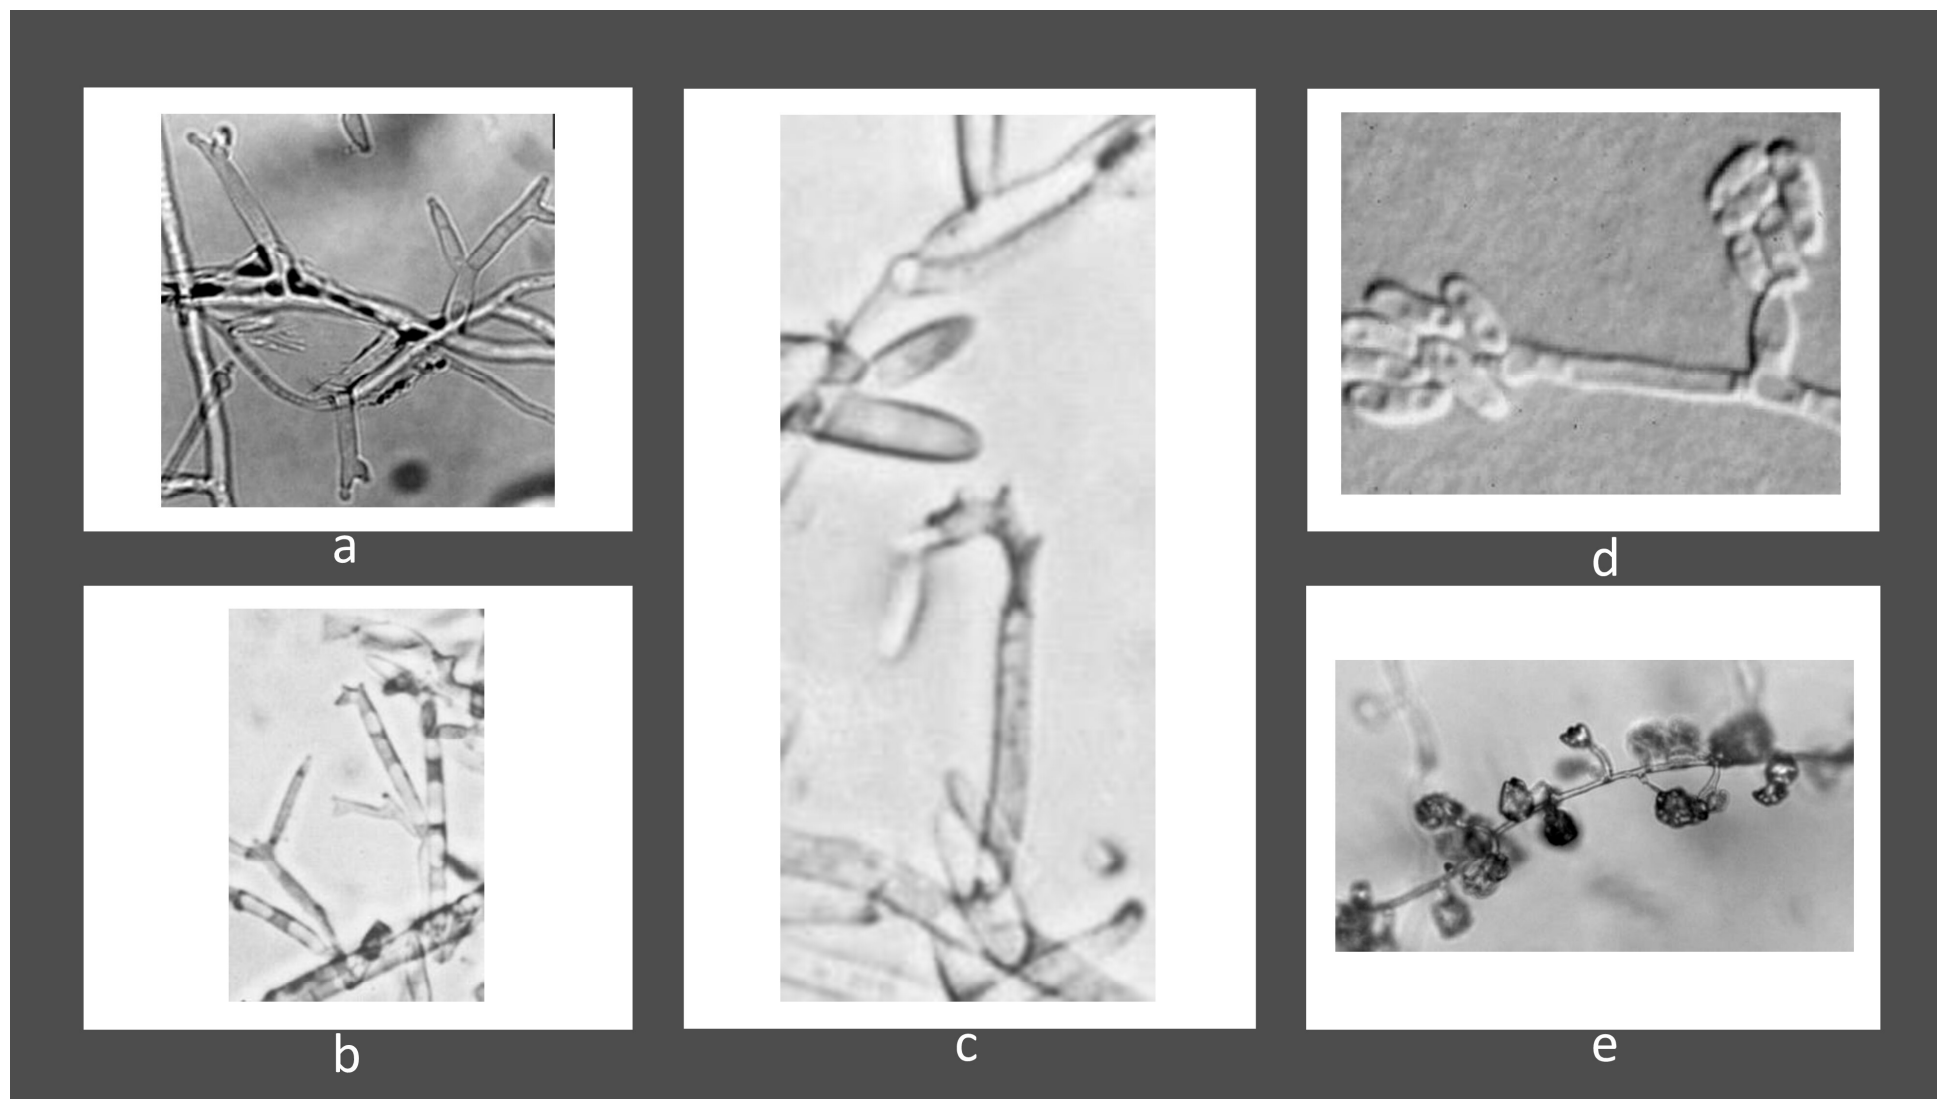

Figure S1: *Fusarium* morphology, a-c—polyphialides; d,e—conidiophore, phialids and conidia.
